# Supplementary material for: Person‐centred care in primary care: What works for whom, how and in what circumstances?
Source: PubMed Central journal article supplement (PMC10083933; doi:10.1111/hsc.13913), 2022-07-21
Supplement: HSC-30-e3328-s001.pdf [file HSC-30-e3328-s001.pdf]

## Appendix B. CMO-configurations per source publication

### Overview context, mechanisms, and outcomes (CMO)

| Context items                                                                                                    | Mechanisms                                                                     | Outcomes                                |
|------------------------------------------------------------------------------------------------------------------|--------------------------------------------------------------------------------|-----------------------------------------|
| C <sub>1</sub> : Equip HCPs with the right knowledge and skills by means of professional training and education. | M <sub>1</sub> : Patients having an active role in their care process          | O <sub>1</sub> : Health outcomes        |
| C <sub>2</sub> : Provide patient education                                                                       | M <sub>2</sub> : Provide effective communication                               | O <sub>2</sub> : Psychological outcomes |
| C <sub>3</sub> : Have a supporting policy in place                                                               | M <sub>3</sub> : Providing self-management support                             | O <sub>3</sub> : Self-management skills |
| C <sub>4</sub> : Patients having social support (networks)                                                       | M <sub>4</sub> : Apply shared decision-making                                  | O <sub>4</sub> : Concordance            |
| C <sub>5</sub> : Accessibility of care                                                                           | M <sub>5</sub> : HCPs showing respect and having an open and empathic attitude | O <sub>5</sub> : Satisfaction           |
| C <sub>6</sub> : Foresee in the required capacity                                                                | M <sub>6</sub> : Have a holistic focus                                         | O <sub>6</sub> : Patient involvement    |
| C <sub>7</sub> : Applying IT- and e-health initiatives                                                           | M <sub>7</sub> : Ensure care coordination                                      | O <sub>7</sub> : Treatment approach     |
| C <sub>8</sub> : Foresee in sufficient time during consultation                                                  | M <sub>8</sub> : Establishing a therapeutic relationship                       | O <sub>8</sub> : Health system outcomes |
| C <sub>9</sub> : Need for shifting away from the dominance of biomedical approach in medical encounter           |                                                                                |                                         |
| C <sub>10</sub> : Have a good collaboration/team                                                                 |                                                                                |                                         |
| C <sub>11</sub> : Set up a personalised care planning                                                            |                                                                                |                                         |

### Overview CMO-configurations per source publication

| CMO-configurations                                                                   |                                                                   |                                                                   | Source (first author, year) |
|--------------------------------------------------------------------------------------|-------------------------------------------------------------------|-------------------------------------------------------------------|-----------------------------|
| C <sub>8</sub>                                                                       | M <sub>1</sub> , M <sub>2</sub> , M <sub>5</sub> , M <sub>8</sub> | -                                                                 | Akseer et al. (2021)        |
| C <sub>2</sub> , C <sub>3</sub> , C <sub>7</sub> , C <sub>10</sub> , C <sub>11</sub> | M <sub>2</sub> , M <sub>3</sub>                                   | O <sub>7</sub>                                                    | Boshuizen et al. (2014)     |
| C <sub>1</sub> , C <sub>8</sub>                                                      | M <sub>1</sub> , M <sub>5</sub> , M <sub>6</sub> , M <sub>8</sub> | O <sub>4</sub> , O <sub>5</sub> , O <sub>6</sub>                  | Brickley et al. (2020)      |
| C <sub>1</sub> , C <sub>8</sub>                                                      | M <sub>1</sub> , M <sub>2</sub> , M <sub>3</sub> , M <sub>4</sub> | O <sub>4</sub> , O <sub>5</sub>                                   | Butterworth et al. (2019)   |
| C <sub>6</sub> , C <sub>10</sub>                                                     | M <sub>1</sub> , M <sub>2</sub> , M <sub>5</sub> , M <sub>8</sub> | -                                                                 | Constand et al. (2014)      |
| C <sub>11</sub>                                                                      | M <sub>1</sub> , M <sub>3</sub> , M <sub>4</sub>                  | O <sub>1</sub> , O <sub>2</sub> , O <sub>3</sub> , O <sub>4</sub> | Coulter et al. (2015)       |
| C <sub>1</sub> , C <sub>3</sub> , C <sub>7</sub>                                     | M <sub>2</sub> , M <sub>6</sub>                                   | O <sub>1</sub> , O <sub>2</sub> , O <sub>6</sub>                  | De Been et al. (2019)       |
| C <sub>2</sub> , C <sub>10</sub>                                                     | M <sub>1</sub> , M <sub>5</sub>                                   | -                                                                 | DeRosa et al. (2019)        |
| C <sub>1</sub>                                                                       | M <sub>2</sub>                                                    | O <sub>1</sub> , O <sub>2</sub> , O <sub>5</sub> , O <sub>6</sub> | Derksen et al. (2013)       |
| C <sub>1</sub> , C <sub>9</sub>                                                      | M <sub>1</sub> , M <sub>4</sub> , M <sub>5</sub>                  | -                                                                 | Ekelmans (2020)             |

|                     |                            |                                                        |                                |
|---------------------|----------------------------|--------------------------------------------------------|--------------------------------|
| C4                  | M3, M4                     | O7                                                     | Eikelenboom (2017)             |
| C9                  | M1, M4                     | -                                                      | Engelberts et al. (2018)       |
| -                   | M2                         | -                                                      | Engels (2019)                  |
| C1, C6, C10         | M2, M4, M5, M6, M8         | -                                                      | Filler et al. (2020)           |
| C1, C6, C8, C10     | M1, M2, M4, M5, M6, M7, M8 | -                                                      | Giusti et al. (2020)           |
| -                   | M4, M5, M6, M7, M8         | -                                                      | Håkansson Eklund et al. (2019) |
| C3, C5, C1          | M2, M3                     | O7                                                     | Heijmans et al. (2016)         |
| C6, C7, C11         | M3, M4, M7                 | O7                                                     | InEen (2016)                   |
| C10, C5             | M6, M7                     | O8                                                     | Jackson et al. (2013)          |
| C1, C4, C6, C7, C10 | M3                         | -                                                      | Jager et al. (2019)            |
| C2, C10             | M3, M7                     | O2, O3, O8                                             | John et al. (2020)             |
| C1                  | M2, M4, M8                 | O1, O4, O5                                             | King et al. (2013)             |
| C1, C2, C4          | M1, M4, M5, M6             | O5, O7                                                 | Lafontaine et al. (2020)       |
| C1                  | -                          | -                                                      | Levesque et al. (2013)         |
| C10                 | M5, M6, M8                 | -                                                      | Louw et al. (2017)             |
| -                   | M5                         | -                                                      | Lundy et al. (2015)            |
| -                   | M1, M5, M6                 | O1, O5                                                 | McMilan et al. (2013)          |
| C1, C8, C9, C10     | M4, M5, M8                 | -                                                      | Mutsaers et al. (2016)         |
| C7                  | M2, M3                     | O4                                                     | National voices (2014a)        |
| C7                  | M1                         | -                                                      | National voices (2014b)        |
| C2, C6, C7          | M2                         | -                                                      | National voices (2014c)        |
| C11                 | -                          | -                                                      | NHG (2017)                     |
| C1, C3, C4, C5      | M2, M6, M7                 | O8                                                     | O'Donnell et al. (2016)        |
| C1, C2, C5, C11     | M1, M4, M6, M7             | Patients: O3, O5, O8; family members: O2, O5; HCPs: O2 | Park et al. (2018)             |
| C1, C9, C10         | M3, M6, M7                 | -                                                      | Postras et al. (2018)          |
| C9                  | M1, M6, M7                 | O6                                                     | PoZoB (2021)                   |
| C1, C11             | M1, M2, M5                 | O1, O3, O5                                             | Rathert et al. (2013)          |
| C1                  | M1                         | -                                                      | Renzaho et al. (2013)          |
| C1                  | M1, M3                     | O3, O4, O6                                             | Rochfort et al. (2018)         |
| C1, C8, C9          | M1, M2, M5                 | O5, O6                                                 | Rocqueet al. (2015)            |

|                          |                |            |                                    |
|--------------------------|----------------|------------|------------------------------------|
| C1, C2, C5, C9, C10      | M1, M2, M7, M8 | -          | Scholl et al. (2014)               |
| -                        | -              | -          | Schwartz et al. (2016)             |
| C1, C10                  | M1, M2, M6, M8 | -          | Sharma et al. (2015)               |
| C1, C6, C7, C8, C10, C11 | M2, M4         | -          | Smeets et al. (2020)               |
| -                        | M1, M3, M4, M7 | O5         | The Health Foundation (2014)       |
| C1                       | M1, M3, M5, M8 | O1, O4     | The Health Foundation (2018)       |
| C4                       | M1, M5, M6     | O1         | Tomaselli et al. (2020)            |
| C1                       | M5, M6         | O1, O5     | Van den Muijsenbergh et al. (2013) |
| C1                       | M2, M8         | O1, O2, O6 | Van den Muijsenbergh (2019)        |
| C3                       | M2, M6         | -          | Van der Meulen (2019)              |
| C1                       | M2, M5, M8     | O7         | Van der Velden (2018)              |
| C1                       | M1, M2, M5, M8 | O1, O4, O8 | Van Weel-Baumgarten et al. (2018)  |
| C2, C7, C11              | -              | O1, O8     | Wildevuur et al. (2015)            |
| C2                       | -              | O6         | Winn et al. (2015)                 |
| C1, C4, C7               | M3, M7, M8     | O3         | Winsor et al. (2013)               |
