# Supplementary material for: Person‐centred care in primary care: What works for whom, how and in what circumstances?
Source: PubMed Central journal article supplement (PMC10083933; doi:10.1111/hsc.13913), 2022-07-21
Supplement: HSC-30-e3328-s002.pdf [file HSC-30-e3328-s002.pdf]

## Appendix A. References of context items, mechanisms, and outcomes

| Construct                                                                                       | References                                                                                                                                                                                                                                                                                                                                                                                                                                                                                                                                                                                                                                                                                                                                                                                                                                                                                    |
|-------------------------------------------------------------------------------------------------|-----------------------------------------------------------------------------------------------------------------------------------------------------------------------------------------------------------------------------------------------------------------------------------------------------------------------------------------------------------------------------------------------------------------------------------------------------------------------------------------------------------------------------------------------------------------------------------------------------------------------------------------------------------------------------------------------------------------------------------------------------------------------------------------------------------------------------------------------------------------------------------------------|
| <b>Context items (C)</b>                                                                        |                                                                                                                                                                                                                                                                                                                                                                                                                                                                                                                                                                                                                                                                                                                                                                                                                                                                                               |
| Equip HCPs with the right knowledge and skills by means of professional training and education. | Brickley et al., 2020; Butterworth et al., 2019; de Been & van den Muijsenbergh, 2019; Derksen, Bensing, & Lagro-Janssen, 2013; Ekelmans, 2020; Filler, Jameel, & Gagliardi, 2020; Giusti et al., 2020; Heijmans, Zwikker, van der Heide, & Rademakers, 2016; Jager et al., 2019; King & Hoppe, 2013; Lafontaine, Bourgault, Girard, & Ellefsen, 2020; Lévesque, Hovey, & Bedos, 2013; Mutsaers, 2016; O'Donnell et al., 2016; Poitras, Maltais, Bestard-Denommé, Stewart, & Fortin, 2018; Rathert, Wyrwich, & Boren, 2013; Renzaho, Romios, Crock, & Sønderslund, 2013; Rochfort et al., 2018; Rocque & Leanza, 2015; Scholl, Zill, Härter, & Dirmaier, 2014; Sharma, Bamford, & Dodman, 2015; Smeets, Kroese, Ruwaard, Hameleers, & Elissen, 2020; The Health Foundation, 2018; Van den Muijsenbergh, 2013; van der Velden, 2018; van Weel-Baumgarten & Brouwers, 2018; Winsor et al., 2013 |
| Have a good collaboration/team                                                                  | Boshuizen, 2014; Constand, MacDermid, Dal Bello-Haas, & Law, 2014; DeRosa et al., 2019; Filler et al., 2020; Giusti et al., 2020; InEen, 2016; Jackson et al., 2013; Jager et al., 2019; John, Jani, Peters, Agho, & Tannous, 2020; Louw, Marcus, & Hugo, 2017; Mutsaers, 2016; Poitras et al., 2018; Scholl et al., 2014; Sharma et al., 2015; Smeets et al., 2020                                                                                                                                                                                                                                                                                                                                                                                                                                                                                                                           |
| Provide patient education                                                                       | Boshuizen, 2014; DeRosa et al., 2019; Eikelenboom, 2017; John et al., 2020; Lafontaine et al., 2020; National Voices, 2014a, 2014c; Park et al., 2018; Scholl et al., 2014; Winn, Ozanne, & Sepucha, 2015                                                                                                                                                                                                                                                                                                                                                                                                                                                                                                                                                                                                                                                                                     |
| Foresee in sufficient time during consultation                                                  | Akseer et al., 2021; Brickley et al., 2020; Butterworth et al., 2019; de Been & van den Muijsenbergh, 2019; Giusti et al., 2020; Mutsaers, 2016; Rocque & Leanza, 2015; Sharma et al., 2015; Smeets et al., 2020                                                                                                                                                                                                                                                                                                                                                                                                                                                                                                                                                                                                                                                                              |
| Patients having social support (networks)                                                       | Eikelenboom, 2017; Jager et al., 2019; Lafontaine et al., 2020; O'Donnell et al., 2016; Park et al., 2018; Smeets et al., 2020; Tomaselli, Buttigieg, Rosano, Cassar, & Grima, 2020; Winsor et al., 2013                                                                                                                                                                                                                                                                                                                                                                                                                                                                                                                                                                                                                                                                                      |

|                                                                                       |                                                                                                                                                                                                                                                                                                                                                                                                                                                                                                                                                                                                              |
|---------------------------------------------------------------------------------------|--------------------------------------------------------------------------------------------------------------------------------------------------------------------------------------------------------------------------------------------------------------------------------------------------------------------------------------------------------------------------------------------------------------------------------------------------------------------------------------------------------------------------------------------------------------------------------------------------------------|
| Set up a personalised care planning                                                   | Coulter et al., 2015; InEen, 2016; NHG, 2017; Poitras et al., 2018; Rathert et al., 2013; Smeets et al., 2020; Wildevuur & Simonse, 2015                                                                                                                                                                                                                                                                                                                                                                                                                                                                     |
| Foresee in the required capacity                                                      | Constand et al., 2014; Filler et al., 2020; Giusti et al., 2020; InEen, 2016; Jager et al., 2019; National Voices, 2014a; Smeets et al., 2020                                                                                                                                                                                                                                                                                                                                                                                                                                                                |
| Applying IT- and e-health initiatives                                                 | Boshuizen, 2014; InEen, 2016; Jager et al., 2019; National Voices, 2014a, 2014b, 2014c; Smeets et al., 2020; Wildevuur & Simonse, 2015; Winsor et al., 2013                                                                                                                                                                                                                                                                                                                                                                                                                                                  |
| Need for shifting away from the dominance of biomedical approach in medical encounter | Ekelmans, 2020; Engelberts, 2018; Mutsaers, 2016; Poitras et al., 2018; PoZoB, 2021; Rocque & Leanza, 2015                                                                                                                                                                                                                                                                                                                                                                                                                                                                                                   |
| Accessibility of care                                                                 | de Been & van den Muijsenbergh, 2019; Heijmans et al., 2016; Jackson et al., 2013; O'Donnell et al., 2016; Park et al., 2018; Scholl et al., 2014                                                                                                                                                                                                                                                                                                                                                                                                                                                            |
| Have a supporting policy in place                                                     | Boshuizen, 2014; de Been & van den Muijsenbergh, 2019; Heijmans et al., 2016; O'Donnell et al., 2016; Smeets et al., 2020; Van der Meulen, 2019                                                                                                                                                                                                                                                                                                                                                                                                                                                              |
| <b>Mechanisms (M)</b>                                                                 |                                                                                                                                                                                                                                                                                                                                                                                                                                                                                                                                                                                                              |
| Provide effective communication                                                       | Akseer et al., 2021; Boshuizen, 2014; Butterworth et al., 2019; Constand et al., 2014; de Been & van den Muijsenbergh, 2019; Derksen et al., 2013; Engels, 2019; Filler et al., 2020; Giusti et al., 2020; Heijmans et al., 2016; Jager et al., 2019; King & Hoppe, 2013; Muijsenbergh, 2019; National Voices, 2014a, 2014b; O'Donnell et al., 2016; Park et al., 2018; PoZoB, 2021; Rathert et al., 2013; Rocque & Leanza, 2015; Scholl et al., 2014; Sharma et al., 2015; Smeets et al., 2020; Van der Meulen, 2019; van der Velden, 2018; van Weel-Baumgarten & Brouwers, 2018; Wildevuur & Simonse, 2015 |
| Have a holistic focus                                                                 | Brickley et al., 2020; de Been & van den Muijsenbergh, 2019; Filler et al., 2020; Giusti et al., 2020; Håkansson Eklund et al., 2019; Jackson et al., 2013; Lafontaine et al., 2020; Louw et al., 2017; McMillan et al., 2013; Muijsenbergh, 2019; O'Donnell et al., 2016; Park et al., 2018; Poitras et al., 2018; PoZoB, 2021; Rocque & Leanza, 2015; Scholl et al., 2014;                                                                                                                                                                                                                                 |

|                                                               |                                                                                                                                                                                                                                                                                                                                                                                                                             |
|---------------------------------------------------------------|-----------------------------------------------------------------------------------------------------------------------------------------------------------------------------------------------------------------------------------------------------------------------------------------------------------------------------------------------------------------------------------------------------------------------------|
|                                                               | Schwartz, Weiner, Binns-Calvey, & Weaver, 2016; Sharma et al., 2015; The Health Foundation, 2018; Tomaselli et al., 2020; Van den Muijsenbergh, 2013; Van der Meulen, 2019                                                                                                                                                                                                                                                  |
| HCPs showing respect and having an open and empathic attitude | Akseer et al., 2021; Brickley et al., 2020; DeRosa et al., 2019; Ekelmans, 2020; Filler et al., 2020; Giusti et al., 2020; Håkansson Eklund et al., 2019; Lafontaine et al., 2020; Lundy et al., 2015; Mutsaers, 2016; Rathert et al., 2013; Rocque & Leanza, 2015; Sharma et al., 2015; Tomaselli et al., 2020; Van den Muijsenbergh, 2013; van der Velden, 2018; van Weel-Baumgarten & Brouwers, 2018                     |
| Patients having an active role in their care process          | Akseer et al., 2021; Butterworth et al., 2019; Coulter et al., 2015; DeRosa et al., 2019; Eikelenboom, 2017; Ekelmans, 2020; Giusti et al., 2020; McMillan et al., 2013; National Voices, 2014c; Park et al., 2018; PoZoB, 2021; Rathert et al., 2013; Scholl et al., 2014; Sharma et al., 2015; The Health Foundation, 2014, 2018; Tomaselli et al., 2020; van Weel-Baumgarten & Brouwers, 2018; Wildevuur & Simonse, 2015 |
| Establishing a therapeutic relationship                       | Akseer et al., 2021; Brickley et al., 2020; Constand et al., 2014; Filler et al., 2020; Giusti et al., 2020; Håkansson Eklund et al., 2019; InEen, 2016; Lafontaine et al., 2020; Louw et al., 2017; Muijsenbergh, 2019; Mutsaers, 2016; Park et al., 2018; Scholl et al., 2014; Sharma et al., 2015; The Health Foundation, 2018; van der Velden, 2018; van Weel-Baumgarten & Brouwers, 2018; Winsor et al., 2013          |
| Providing self-management support                             | Boshuizen, 2014; Butterworth et al., 2019; Coulter et al., 2015; Eikelenboom, 2017; Filler et al., 2020; Heijmans et al., 2016; InEen, 2016; Jager et al., 2019; John et al., 2020; National Voices, 2014b; Poitras et al., 2018; Rochfort et al., 2018; The Health Foundation, 2014, 2018; Winsor et al., 2013                                                                                                             |
| Apply shared decision-making                                  | Brickley et al., 2020; Butterworth et al., 2019; Coulter et al., 2015; Eikelenboom, 2017; Ekelmans, 2020; Engelberts, 2018; Giusti et al., 2020; Håkansson Eklund et al., 2019; InEen, 2016; Lafontaine et al., 2020; Mutsaers, 2016; Park et al., 2018; Sharma et al., 2015; Smeets et al., 2020; The Health Foundation, 2014                                                                                              |
| Ensure care coordination                                      | Giusti et al., 2020; Håkansson Eklund et al., 2019; Jackson et al., 2013; John et al., 2020; O'Donnell et al., 2016; Park et al., 2018; Poitras et al., 2018; PoZoB, 2021; Scholl et al., 2014; The Health Foundation, 2014; Winsor et al., 2013                                                                                                                                                                            |

| Outcomes (O)           |                                                                                                                                                                                                                                                                                                                                                                                     |
|------------------------|-------------------------------------------------------------------------------------------------------------------------------------------------------------------------------------------------------------------------------------------------------------------------------------------------------------------------------------------------------------------------------------|
| Health outcomes        | Coulter et al., 2015; de Been & van den Muijsenbergh, 2019; Derksen et al., 2013; John et al., 2020; King & Hoppe, 2013; McMillan et al., 2013; Muijsenbergh, 2019; Park et al., 2018; Rathert et al., 2013; Renzaho et al., 2013; The Health Foundation, 2018; Tomaselli et al., 2020; Van den Muijsenbergh, 2013; van Weel-Baumgarten & Brouwers, 2018; Wildevuur & Simonse, 2015 |
| Patient involvement    | de Been & van den Muijsenbergh, 2019; Derksen et al., 2013; DeRosa et al., 2019; Muijsenbergh, 2019; National Voices, 2014a, 2014c; PoZoB, 2021; Rochfort et al., 2018; Rocque & Leanza, 2015; Winn et al., 2015                                                                                                                                                                    |
| Health system outcomes | Butterworth et al., 2019; de Been & van den Muijsenbergh, 2019; Jackson et al., 2013; John et al., 2020; McMillan et al., 2013; O'Donnell et al., 2016; Park et al., 2018; Van den Muijsenbergh, 2013; van Weel-Baumgarten & Brouwers, 2018; Wildevuur & Simonse, 2015                                                                                                              |
| Satisfaction           | Brickley et al., 2020; Derksen et al., 2013; King & Hoppe, 2013; Lafontaine et al., 2020; McMillan et al., 2013; Park et al., 2018; Rathert et al., 2013; Rocque & Leanza, 2015; The Health Foundation, 2014                                                                                                                                                                        |
| Concordance            | Brickley et al., 2020; Coulter et al., 2015; King & Hoppe, 2013; National Voices, 2014a, 2014b; Rochfort et al., 2018; Rocque & Leanza, 2015; The Health Foundation, 2018; van Weel-Baumgarten & Brouwers, 2018                                                                                                                                                                     |
| Self-management skills | Coulter et al., 2015; John et al., 2020; National Voices, 2014b; Park et al., 2018; Rathert et al., 2013; Rochfort et al., 2018; Winsor et al., 2013                                                                                                                                                                                                                                |
| Psychological outcomes | Butterworth et al., 2019; Coulter et al., 2015; de Been & van den Muijsenbergh, 2019; Derksen et al., 2013; John et al., 2020; Muijsenbergh, 2019                                                                                                                                                                                                                                   |
| Improved treatment     | Boshuizen, 2014; Eikelenboom, 2017; Heijmans et al., 2016; InEen, 2016; McMillan et al., 2013; O'Donnell et al., 2016; Park et al., 2018; Rocque & Leanza, 2015; van der Velden, 2018; van Weel-Baumgarten & Brouwers, 2018                                                                                                                                                         |

## References:

- Akseer, R., Connolly, M., Cosby, J., Frost, G., Kanagarajah, R. R., & Lim, S.-H. E. (2021). Clinician–patient relationships after two decades of a paradigm of patient-centered care. *International Journal of Healthcare Management*, *14*(3), 888-897.
- Boshuizen, D., Engels, J., Versleijen, M., Vlek, H., Rebel, M., & Driessen, S. (2014). White paper – Hoe maak je een succes van persoonsgerichte zorg? In. Utrecht, The Netherlands.
- Brickley, B., Sladdin, I., Williams, L. T., Morgan, M., Ross, A., Trigger, K., & Ball, L. (2020). A new model of patient-centred care for general practitioners: results of an integrative review. *Fam Pract*, *37*(2), 154-172. doi:10.1093/fampra/cmz063
- Butterworth, J. E., Hays, R., McDonagh, S. T., Richards, S. H., Bower, P., & Campbell, J. (2019). Interventions for involving older patients with multi-morbidity in decision-making during primary care consultations. *Cochrane Database Syst Rev*, *2019*(10). doi:10.1002/14651858.CD013124.pub2
- Constand, M. K., MacDermid, J. C., Dal Bello-Haas, V., & Law, M. (2014). Scoping review of patient-centered care approaches in healthcare. *BMC Health Serv Res*, *14*, 271. doi:10.1186/1472-6963-14-271
- Coulter, A., Entwistle, V. A., Eccles, A., Ryan, S., Shepperd, S., & Perera, R. (2015). Personalised care planning for adults with chronic or long-term health conditions. *Cochrane Database Syst Rev*, *2015*(3), Cd010523. doi:10.1002/14651858.CD010523.pub2
- de Been, M., & van den Muijsenbergh, M. (2019). persoons-gerichte, integrale zorg. *TVZ-Verpleegkunde in praktijk en wetenschap*, *129*(4), 16-18.
- Derksen, F., Bensing, J., & Lagro-Janssen, A. (2013). Effectiveness of empathy in general practice: a systematic review. *Br J Gen Pract*, *63*(606), e76-84. doi:10.3399/bjgp13X660814

- DeRosa, A. P., Baltich Nelson, B., Delgado, D., Mages, K. C., Martin, L., & Stribling, J. C. (2019). Involvement of information professionals in patient- and family-centered care initiatives: a scoping review. *J Med Libr Assoc*, *107*(3), 314-322. doi:10.5195/jmla.2019.652
- Eikelenboom, N. (2017). *Personalised self-management support in primary care: one size does not fit all*. [Sl: sn],
- Ekelmans, N. (2020). Persoonsgerichte zorg leidt tot betere uitkomsten op lange (re) termijn. *Nederlands Tijdschrift voor Diabetologie*, *18*(3), 38-40.
- Engelberts, I., Schermer, M., & Prins, A. . (2018). Een goed gesprek is de beste persoonsgerichte zorg. *Medisch Contact*, *30-31*, 18-20.
- Engels, J. (2019). Zelfmanagement en gezondheidsvaardigheden. Retrieved from <https://www.zorgvoorbeter.nl/persoonsgerichte-zorg/gezondheidsvaardigheden>
- Filler, T., Jameel, B., & Gagliardi, A. R. (2020). Barriers and facilitators of patient centered care for immigrant and refugee women: a scoping review. *BMC Public Health*, *20*(1), 1013. doi:10.1186/s12889-020-09159-6
- Giusti, A., Nkhoma, K., Petrus, R., Petersen, I., Gwyther, L., Farrant, L., . . . Harding, R. (2020). The empirical evidence underpinning the concept and practice of person-centred care for serious illness: a systematic review. *BMJ global health*, *5*(12), e003330.
- Håkansson Eklund, J., Holmström, I. K., Kumlin, T., Kaminsky, E., Skoglund, K., Högländer, J., . . . Summer Meranius, M. (2019). "Same same or different?" A review of reviews of person-centered and patient-centered care. *Patient Educ Couns*, *102*(1), 3-11. doi:10.1016/j.pec.2018.08.029
- Heijmans, M., Zwikker, H., van der Heide, I., & Rademakers, J. (2016). NIVEL Kennisvraag 2016: Zorg op maat. *Hoe kunnen we de zorg beter laten aansluiten bij mensen met lage gezondheidsvaardigheden*.
- InEen. (2016). Special: persoonsgerichte zorg. In. Utrecht, The Netherlands.

- Jackson, G. L., Powers, B. J., Chatterjee, R., Bettger, J. P., Kemper, A. R., Hasselblad, V., . . . Williams, J. W. (2013). The patient centered medical home. A systematic review. *Ann Intern Med*, *158*(3), 169-178. doi:10.7326/0003-4819-158-3-201302050-00579
- Jager, M., de Zeeuw, J., Tullius, J., Papa, R., Giammarchi, C., Whittal, A., & de Winter, A. F. (2019). Patient Perspectives to Inform a Health Literacy Educational Program: A Systematic Review and Thematic Synthesis of Qualitative Studies. *Int J Environ Res Public Health*, *16*(21). doi:10.3390/ijerph16214300
- John, J. R., Jani, H., Peters, K., Agho, K., & Tannous, W. K. (2020). The Effectiveness of Patient-Centred Medical Home-Based Models of Care versus Standard Primary Care in Chronic Disease Management: A Systematic Review and Meta-Analysis of Randomised and Non-Randomised Controlled Trials. *Int J Environ Res Public Health*, *17*(18). doi:10.3390/ijerph17186886
- King, A., & Hoppe, R. B. (2013). "Best practice" for patient-centered communication: a narrative review. *J Grad Med Educ*, *5*(3), 385-393. doi:10.4300/jgme-d-13-00072.1
- Lafontaine, S., Bourgault, P., Girard, A., & Ellefsen, E. (2020). Dimensions, application, and outcomes of person-centered self-management interventions for those living with type 2 diabetes: a scoping review. *Patient Educ Couns*, *103*(10), 1961-1982.
- Lévesque, M., Hovey, R., & Bedos, C. (2013). Advancing patient-centered care through transformative educational leadership: a critical review of health care professional preparation for patient-centered care. *Journal of Healthcare Leadership*, *5*, 35-46.
- Louw, J. M., Marcus, T. S., & Hugo, J. F. M. (2017). Patient- or person-centred practice in medicine? - A review of concepts. *Afr J Prim Health Care Fam Med*, *9*(1), e1-e7. doi:10.4102/phcfm.v9i1.1455

- Lundy, J.-M., Bikker, A., Higgins, M., Watt, G. C., Little, P., Humphries, G. M., & Mercer, S. W. (2015). General practitioners' patient-centredness and responses to patients' emotional cues and concerns: relationships with perceived empathy in areas of high and low socioeconomic deprivation. *Journal of Compassionate Health Care*, 2(1), 2. doi:10.1186/s40639-015-0011-6
- McMillan, S. S., Kendall, E., Sav, A., King, M. A., Whitty, J. A., Kelly, F., & Wheeler, A. J. (2013). Patient-centered approaches to health care: a systematic review of randomized controlled trials. *Med Care Res Rev*, 70(6), 567-596. doi:10.1177/1077558713496318
- Muijsenbergh, v. d. (2019). Gezondheidsverschillen vragen om persoonsgerichte, integrale zorg door eerstelijns-en publieke gezondheidszorg. *Tijdschrift voor gezondheidswetenschappen*, 97(1), 36-39. doi:10.1007/s12508-019-0223-9
- Mutsaers, I., & Van der Horst, H. . (2016). Maak van persoonsgerichte zorg geen ideologie. *Medisch Contact*, 43, 37-39.
- National Voices. (2014a). *Improving information and understanding*. . Retrieved from London, United Kingdom:
- National Voices. (2014b). *Supporting self-management*. Retrieved from London, United Kingdom:
- National Voices. (2014c). *Supporting shared decision-making*. Retrieved from London, United Kingdom:
- NHG. (2017). Handreiking - Gezamenlijke besluitvorming over doelen en zorgafspraken. . In. Utrecht, the Netherlands.
- O'Donnell, C. A., Burns, N., Mair, F. S., Dowrick, C., Clissmann, C., van den Muijsenbergh, M., . . . MacFarlane, A. (2016). Reducing the health care burden for marginalised migrants: The potential role for primary care in Europe. *Health Policy*, 120(5), 495-508. doi:10.1016/j.healthpol.2016.03.012
- Park, M., Giap, T. T., Lee, M., Jeong, H., Jeong, M., & Go, Y. (2018). Patient- and family-centered care interventions for improving the quality of health care: A review of systematic reviews. *Int J Nurs Stud*, 87, 69-83. doi:10.1016/j.ijnurstu.2018.07.006



- Poitras, M. E., Maltais, M. E., Bestard-Denommé, L., Stewart, M., & Fortin, M. (2018). What are the effective elements in patient-centered and multimorbidity care? A scoping review. *BMC Health Serv Res*, *18*(1), 446. doi:10.1186/s12913-018-3213-8
- PoZoB. (2021). Aan de slag met persoonsgerichte zorg. . Retrieved from <https://www.pozob.nl/persoonsgerichte-zorg/aan-de-slag-met-persoonsgerichte-zorg/>
- Rathert, C., Wyrwich, M. D., & Boren, S. A. (2013). Patient-centered care and outcomes: a systematic review of the literature. *Med Care Res Rev*, *70*(4), 351-379. doi:10.1177/1077558712465774
- Renzaho, A. M., Romios, P., Crock, C., & Sønderlund, A. L. (2013). The effectiveness of cultural competence programs in ethnic minority patient-centered health care--a systematic review of the literature. *Int J Qual Health Care*, *25*(3), 261-269. doi:10.1093/intqhc/mzt006
- Rochfort, A., Beirne, S., Doran, G., Patton, P., Gensichen, J., Kunnamo, I., . . . Collins, C. (2018). Does patient self-management education of primary care professionals improve patient outcomes: a systematic review. *BMC Fam Pract*, *19*(1), 163. doi:10.1186/s12875-018-0847-x
- Rocque, R., & Leanza, Y. (2015). A Systematic Review of Patients' Experiences in Communicating with Primary Care Physicians: Intercultural Encounters and a Balance between Vulnerability and Integrity. *PLoS One*, *10*(10), e0139577. doi:10.1371/journal.pone.0139577
- Scholl, I., Zill, J. M., Härter, M., & Dirmaier, J. (2014). An integrative model of patient-centeredness - a systematic review and concept analysis. *PLoS One*, *9*(9), e107828. doi:10.1371/journal.pone.0107828
- Schwartz, A., Weiner, S. J., Binns-Calvey, A., & Weaver, F. M. (2016). Providers contextualise care more often when they discover patient context by asking: meta-analysis of three primary data sets. *BMJ Qual Saf*, *25*(3), 159-163. doi:10.1136/bmjqs-2015-004283

Sharma, T., Bamford, M., & Dodman, D. (2015). Person-centred care: an overview of reviews. *Contemp Nurse*, 51(2-3), 107-120.

doi:10.1080/10376178.2016.1150192

Smeets, R. G., Kroese, M. E., Ruwaard, D., Hameleers, N., & Elissen, A. M. (2020). Person-centred and efficient care delivery for high-need, high-cost patients: primary care professionals' experiences. *BMC Fam Pract*, 21(1), 1-9. doi:10.1186/s12875-020-01172-3

The Health Foundation. (2014). *Ideas into practice: person-centered care in practice*. Retrieved from London, United Kingdom:

The Health Foundation. (2018). *Person-centred care made simple - What everyone should know about person-centred care*. . Retrieved from London, United Kingdom:

Tomaselli, G., Buttigieg, S. C., Rosano, A., Cassar, M., & Grima, G. (2020). Person-Centered Care From a Relational Ethics Perspective for the Delivery of High Quality and Safe Healthcare: A Scoping Review. *Front Public Health*, 8, 44. doi:10.3389/fpubh.2020.00044

Van den Muijsenbergh, M., & Oostenberg, E.H. (2013). Patiëntgericht én cultureel competent Goede zorg voor allochtone patiënten vereist specifieke competenties. *Ned Tijdschr Geneeskd.*, 157(A5612).

Van der Meulen, M. (2019). Interview - Aandacht voor cultuursensitieve zorg hard nodig. . Retrieved from <https://www.vilans.nl/artikelen/interview-aandacht-voor-cultuursensitieve-zorg-hard-nodig>

van der Velden, J. H. (2018). Persoonsgerichte zorg bij mensen met een migratieachtergrond. *Bijblijven*, 34(3), 207-217.

van Weel-Baumgarten, E. M., & Brouwers, M. (2018). Persoonsgerichte communicatie—wat is dat en wat levert het op? *Bijblijven*, 34(3), 218-227.

Wildevuur, S. E., & Simonse, L. W. (2015). Information and communication technology-enabled person-centered care for the "big five" chronic conditions: scoping review. *J Med Internet Res*, 17(3), e77. doi:10.2196/jmir.3687

- Winn, K., Ozanne, E., & Sepucha, K. (2015). Measuring patient-centered care: An updated systematic review of how studies define and report concordance between patients' preferences and medical treatments. *Patient Educ Couns*, *98*(7), 811-821. doi:10.1016/j.pec.2015.03.012
- Winsor, S., Smith, A., Vanstone, M., Giacomini, M., Brundisini, F. K., & DeJean, D. (2013). Experiences of patient-centredness with specialized community-based care: a systematic review and qualitative meta-synthesis. *Ont Health Technol Assess Ser*, *13*(17), 1-33.
